# Supplementary material for: 1,1′-Ferrocenedicarboxylic acid/tetrahydrofuran induced precipitation of calcium carbonate with a multi-level structure in water
Source: Royal Society of Chemistry journal article supplement (doi:10.1039/d1ce00763g), 2021-01-01
Supplement: d1ce00763g1.pdf [file d1ce00763g1.pdf]

## Supporting information

# **1, 1'-Ferrocenedicarboxylic acid/tetrahydrofuran induced precipitation of calcium carbonate with multi-level structure in water**

|                                   |           |
|-----------------------------------|-----------|
| <b>Experimental section .....</b> | <b>S1</b> |
| <b>Figure S1 .....</b>            | <b>S2</b> |
| <b>Figure S2 .....</b>            | <b>S2</b> |
| <b>Figure S3 .....</b>            | <b>S3</b> |
| <b>Figure S4 .....</b>            | <b>S3</b> |
| <b>Figure S5 .....</b>            | <b>S4</b> |
| <b>Figure S6 .....</b>            | <b>S4</b> |

## Experimental section

**Materials:** 1, 1'-ferrocenedicarboxylic acid ( $C_{12}H_{10}FeO_4$ , >98.0%), anhydrous calcium chloride ( $CaCl_2$ , analytical grade) and anhydrous ammonium carbonate ( $(NH_4)_2CO_3$ , analytical grade) were provided by Shanghai Aladdin Biochemical Technology Co., Ltd., China. Anhydrous tetrahydrofuran ( $C_4H_8O$ , analytical grade) was purchased from Chengdu Chron Chemical Reagent Co., Ltd., China.

With the goal of studying the precipitation of  $CaCO_3$  in various organic solvents in the presence of FA, we mainly focused on its diverse behaviors. The total settling time was appropriate 6 hours.

**Precipitation of  $CaCO_3$ :** 0.1 M solutions of  $CaCl_2$  in water were prepared stirring the previously dried salts 2 hours and dispersing with sonication for 30 minutes. Varied solutions of FA in THF (as reported in Table 1) was added into  $CaCl_2$  solution under vigorous stirring. The color of the mixed solution gradually deepened and finally turned into brown-black. The solutions were filtered with 0.45  $\mu m$  filters. A vial containing  $(NH_4)_2CO_3$  (0.1057 g) was hung on the inner wall of the beaker where the mixed solution is located. Then the beaker was sealed twice by the sealing film. After precipitation for 6 hours, the solutions were centrifuged at 4500 g for 10 minutes. The samples were washed twice with THF, then the precipitate was collected by a centrifuge and dried in a vacuum drying oven at 60  $^{\circ}C$  for 24 hours.

**Characterization:** Powder XRD measurement was carried out using an X-ray diffractometer (SHIMADZU XRD-6100) with Cu-K $\alpha$  radiation ( $\lambda=1.5406 \text{ \AA}$ ) at 40 kV and 30 mA. Sample morphology was determined using an SEM (Prisma E, Thermo Fisher Scientific, China) and TEM (JEM-2100 Plus, JEOL Ltd., Japan). High-resolution mass spectra are recorded on a Shimadzu LCMS-IT-TOF instrument in the ESI mode. The absorption spectra in the middle IR range (4000–400  $cm^{-1}$ ) are recorded using a Nicolet Fourier-Transform IS10 instrument (Thermo Scientific, USA). The FTIR spectra are recorded at a resolution of 2  $cm^{-1}$  and with an average of 16 scans per sample.

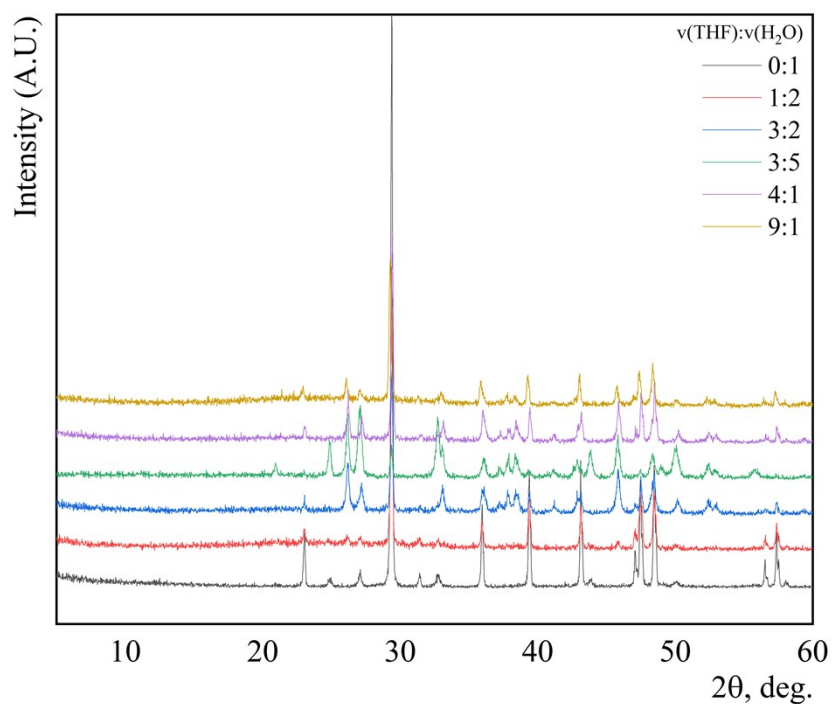

**Figure S1** Influence of solvent ratios (H<sub>2</sub>O-THF) on the precipitation of CaCO<sub>3</sub>: XRD results of products of v(THF)=0 mL, v(H<sub>2</sub>O)=100 mL; v(THF)=50 mL, v(H<sub>2</sub>O)=100 mL; v(THF)=60 mL, v(H<sub>2</sub>O)=100 mL; v(THF)=150 mL, v(H<sub>2</sub>O)=100 mL; v(THF)=200 mL, v(H<sub>2</sub>O)=50 mL; v(THF)=180 mL, v(H<sub>2</sub>O)=20 mL.

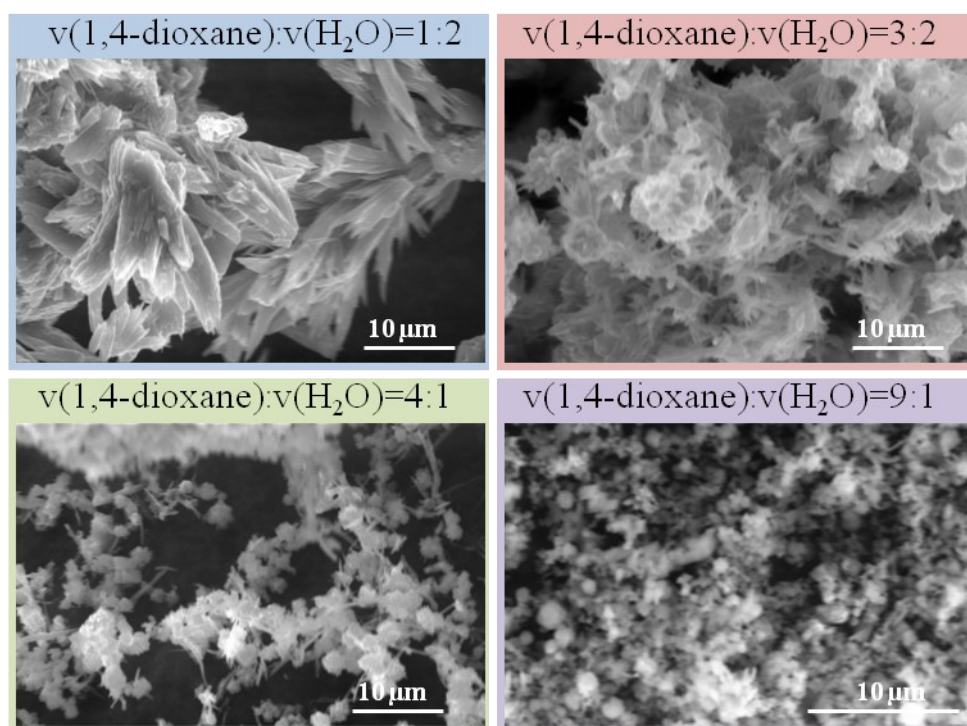

**Figure S2** Influence of solvent ratios (H<sub>2</sub>O -1,4-dioxane) on the precipitation of CaCO<sub>3</sub>: SEM images of products of v(H<sub>2</sub>O): v(1,4-dioxane)=1:1; v(H<sub>2</sub>O): v(1,4-dioxane)=1:1.25; v(H<sub>2</sub>O): v(1,4-dioxane)=1:1.5; v(H<sub>2</sub>O): v(1,4-dioxane)=1:1.75.

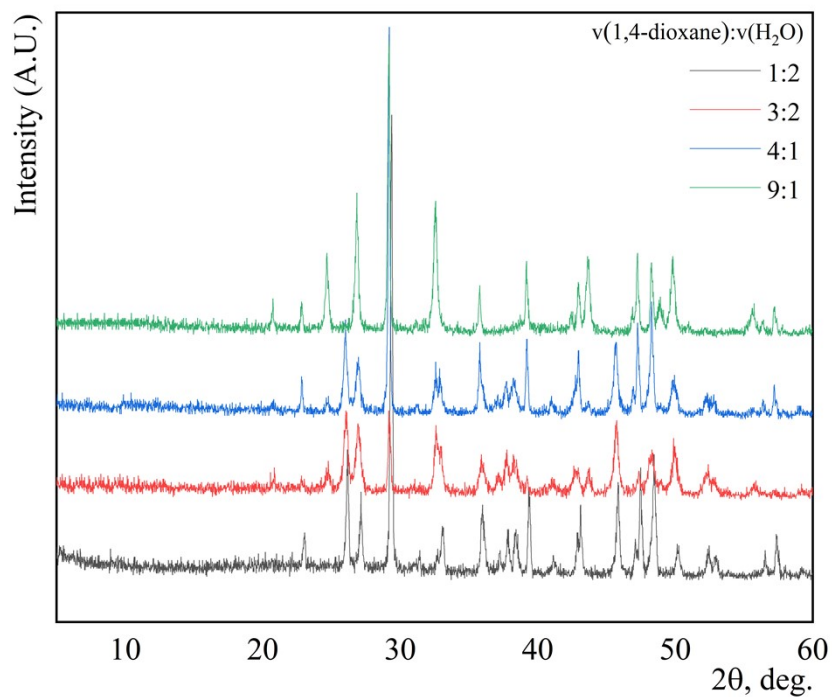

**Figure S3** Influence of solvent ratios (H<sub>2</sub>O -1,4-dioxane) on the precipitation of CaCO<sub>3</sub>; XRD results of products of v(H<sub>2</sub>O): v(1,4-dioxane)=1:1; v(H<sub>2</sub>O): v(1,4-dioxane)=1:1.25; v(H<sub>2</sub>O): v(1,4-dioxane)=1:1.5; v(H<sub>2</sub>O): v(1,4-dioxane)=1:1.75.

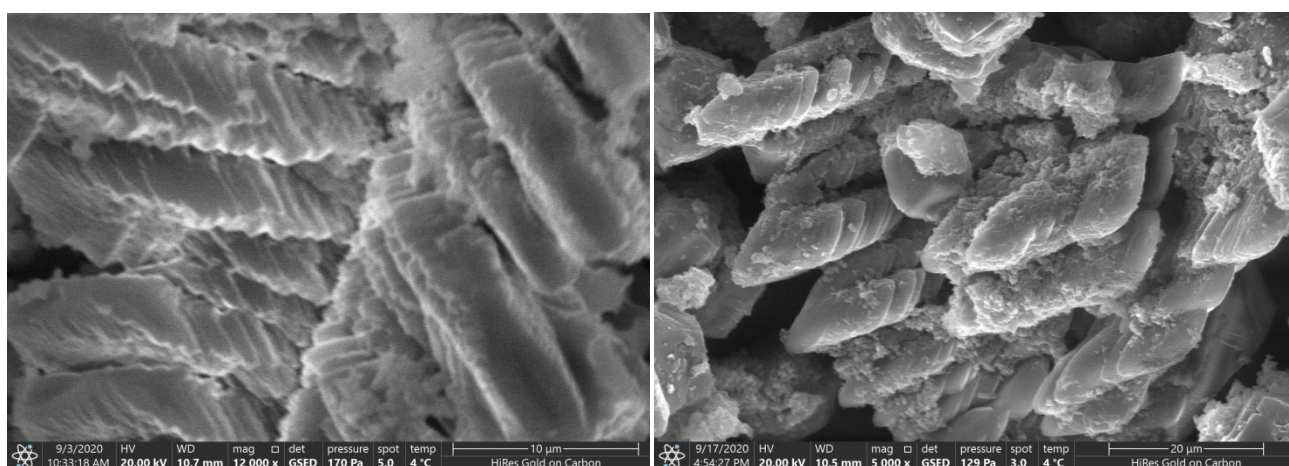

**Figure S4** SEM analysis of the products from reaction c3 (Ca<sup>2+</sup>:FA=1:0.5) and c4 (Ca<sup>2+</sup>:FA=1:0.75) with the magnification of 12000 and 5000 times were performed.

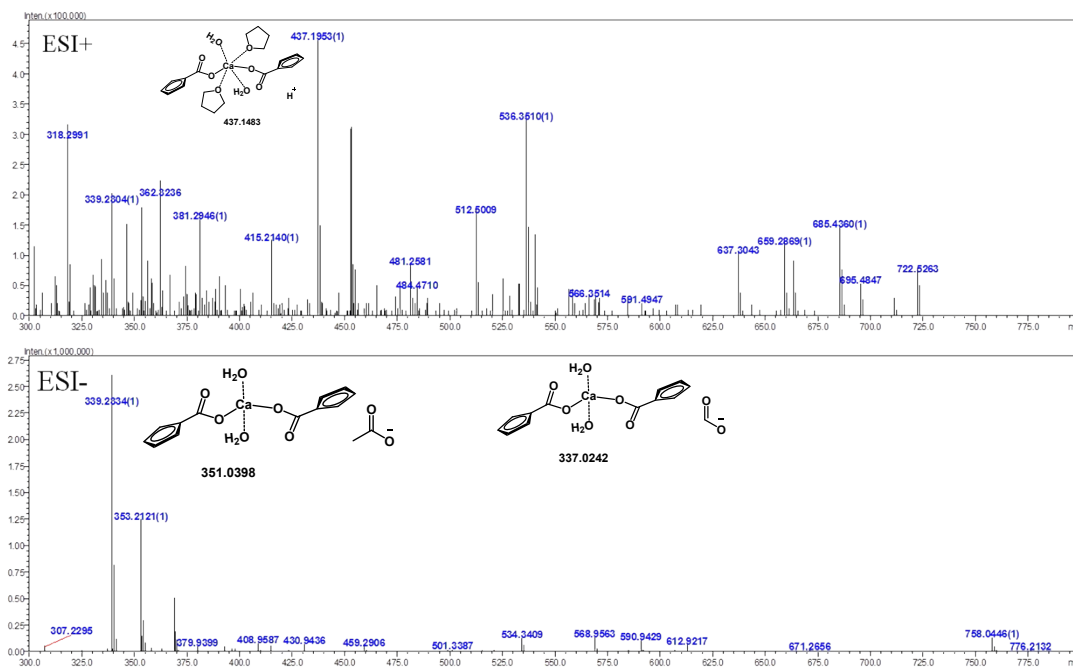

**Figure S5** The original HRMS results of volume ratio of solvent ( $\text{H}_2\text{O}:\text{THF}=1:10$ ),  $\text{CaCl}_2$  (1 mM) and FA (2 mM) in the ESI mode.

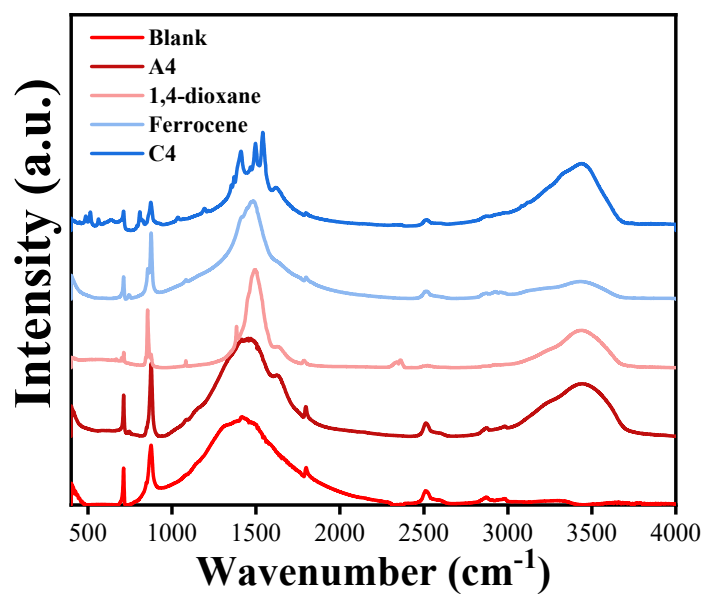

**Figure S6** Complete FTIR spectrum of fig. 3D.
